# Supplementary material for: Broiler Age Differently Affects Apparent Metabolizable Energy and Net Energy of Expanded Soybean Meal
Source: MDPI journal article supplement (doi:10.3390/ani14081198), 2024-04-16
Supplement: s1 [file s1]

**Table S1.** Effects of dietary characteristics on body weight, metabolic body weight and respiratory data of broilers.

| Items                                        | Basal              | Test diets         |                    |                    | Mean    | SEM    | p-value |
|----------------------------------------------|--------------------|--------------------|--------------------|--------------------|---------|--------|---------|
|                                              | diet               | ESBM1              | ESBM2              | ESBM3              |         |        |         |
| From 14 to 16 day                            |                    |                    |                    |                    |         |        |         |
| Initial BW (g)                               | 417.46             | 412.79             | 411.79             | 429.46             | 417.88  | 6.878  | 0.813   |
| Final BW (g)                                 | 607.38             | 607.96             | 630.75             | 620.25             | 616.58  | 9.661  | 0.823   |
| BW <sup>0.70</sup>                           | 626.09             | 624.15             | 633.35             | 636.49             | 630.02  | 6.458  | 0.906   |
| O <sub>2</sub> (L/kg BW <sup>0.70</sup> /d)  | 56.90              | 51.75              | 51.43              | 51.04              | 52.78   | 1.043  | 0.150   |
| CO <sub>2</sub> (L/kg BW <sup>0.70</sup> /d) | 55.96 <sup>a</sup> | 50.34 <sup>b</sup> | 50.62 <sup>b</sup> | 49.97 <sup>b</sup> | 51.72   | 0.857  | 0.029   |
| From 28 to 30 day                            |                    |                    |                    |                    |         |        |         |
| Initial BW (g)                               | 1410.33            | 1435.33            | 1433.25            | 1396.42            | 1418.83 | 12.250 | 0.653   |
| Final BW (g)                                 | 1740.75            | 1750.58            | 1775.17            | 1737.83            | 1751.08 | 11.186 | 0.660   |
| BW <sup>0.70</sup>                           | 1248.99            | 1246.31            | 1275.57            | 1252.49            | 1255.84 | 10.096 | 0.750   |
| O <sub>2</sub> (L/kg BW <sup>0.70</sup> /d)  | 48.09              | 48.24              | 47.82              | 46.86              | 47.75   | 0.746  | 0.926   |
| CO <sub>2</sub> (L/kg BW <sup>0.70</sup> /d) | 48.02              | 46.76              | 46.73              | 46.84              | 47.09   | 0.582  | 0.855   |

BW<sup>0.70</sup> calculated as average of initial and final body weight. Data of O<sub>2</sub> and CO<sub>2</sub>

is automatically recorded at 3-min interval by chambers and calculated as daily.

<sup>a-b</sup> Means within rows with different superscripts are significantly different ( $p < 0.05$ ).
